# Supplementary material
Source: publisher figshare collection journal article supplement (https://tandf.figshare.com/articles/dataset/_/25325834)
Supplement: Supplementary file 2 [file 1]

This document certifies that the manuscript

**Epidemiological age-based differences in traumatic spinal cord injury patients: a multicenter study based on 13,334 inpatients**

prepared by the authors

**Chaoyu Wang, Shenghui Shang, Mengfan Hou, Yi Kang, Yongfu Lou, Wei Wang, Hua Zhao, Lingxiao Chen, Hengxing Zhou, Shiqing Feng**

was edited for proper English language, grammar, punctuation, spelling, and overall style by one or more of the highly qualified native English speaking editors at AJE.

This certificate was issued on **December 29, 2022** and may be verified on the [AJE website](https://aje.com) using the verification code **C2C7-64EA-ACB1-9D2A-993P**.

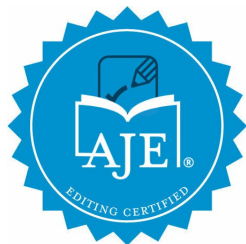

Neither the research content nor the authors' intentions were altered in any way during the editing process. Documents receiving this certification should be English-ready for publication; however, the author has the ability to accept or reject our suggestions and changes. To verify the final AJE edited version, please visit our verification page at [aje.com/certificate](https://aje.com/certificate). If you have any questions or concerns about this edited document, please contact AJE at [support@aje.com](mailto:support@aje.com).
